# Supplementary material
Source: Springer Nature journal article supplement (https://www.springermedizin.de/resource/supplementary/12881_2007_276_MOESM5_ESM.pdf/9452790)

↓

|                               |   |   |   |   |   |   |   |   |   |   |   |   |   |   |   |   |   |   |   |   |   |   |   |
|-------------------------------|---|---|---|---|---|---|---|---|---|---|---|---|---|---|---|---|---|---|---|---|---|---|---|
| <i>Homo sapiens</i>           | C | S | V | L | P | S | H | W | R | C | N | K | T | L | P | V | A | F | K | V | V | A | I |
| <i>Mus musculus</i>           | C | S | V | L | P | S | H | W | R | C | N | K | T | L | P | V | A | F | K | V | V | A | I |
| <i>Rattus norvegicus</i>      | C | S | V | L | P | S | H | W | R | C | N | K | T | L | P | V | A | F | K | V | V | A | I |
| <i>Gallus gallus</i>          | C | S | V | L | P | S | H | W | R | C | N | K | T | L | P | V | A | F | K | V | V | A | I |
| <i>Xenopus laevis</i>         | C | S | V | L | P | S | H | W | R | C | N | K | T | L | P | V | A | F | K | V | V | A | I |
| <i>Brachydanio rerio</i>      | C | S | V | L | P | S | H | W | R | C | N | K | T | L | P | V | A | F | K | V | V | A | I |
| <i>Fugu rubripes</i>          | C | S | V | L | P | S | H | W | R | C | N | K | T | L | P | V | A | F | K | V | V | A | I |
| <i>Tetraodon nigroviridis</i> | C | S | V | L | P | S | H | W | R | C | N | K | T | L | P | V | A | F | K | V | V | A | I |
| <i>Raja eglanteria</i>        | C | S | V | L | P | S | H | W | R | C | N | K | T | L | P | V | A | F | K | V | V | A | I |
| <i>Oryzias latipes</i>        | C | S | V | L | P | S | H | W | R | C | N | K | T | L | P | V | A | F | K | V | V | A | I |

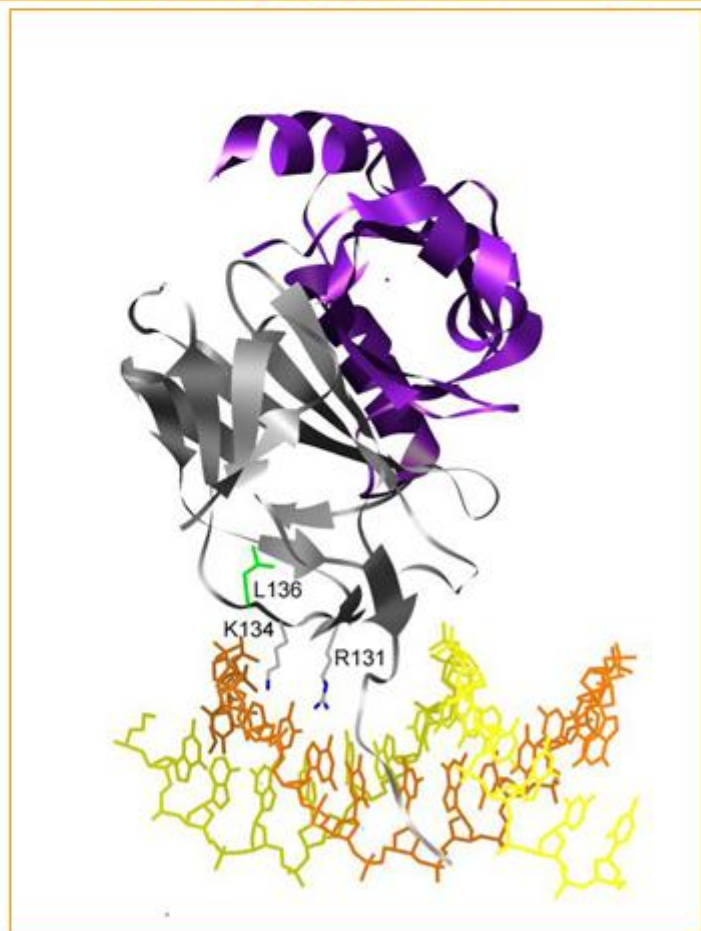

Supplement: MOESM5 [file 9452790]
